# Supplementary material for: Model checking in multiple imputation: an overview and case study
Source: Emerg Themes Epidemiol. 2017 Aug 23;14:8. doi: 10.1186/s12982-017-0062-6 (PMC5569512; doi:10.1186/s12982-017-0062-6)
Supplement: Supplementary file 1 — Additional file 1. Example Stata code for performing checks of multiple imputation models [file 12982_2017_62_MOESM1_ESM.do]

/*______________________________________________________________________________

	Model checking in multiple imputation: an overview and case study
	
	SAMPLE STATA CODE
	
	DATASET: LSAC.dta
	Nb. This dataset is not publicly available, but applications can be made to access
	the data at: http://www.growingupinaustralia.gov.au/data/dataaccessmenu.html
	
	VARIABLES IN THE ANALYSIS:
	conduct_bin: Conduct problems at Wave 4(binary version of outcome variable)
	conduct_cont: SDQ conduct score at Wave 4 (continuous version of outcome variable)	
	harsh: Harsh discipline at Wave 2
	sex: Sex (Male=1, Female=0) 
	SEP: Socioeconomic Z-Score at Wave 2
	hardship: Family financial hardship at Wave 2
	distress: Maternal distress at Wave 2
	
	ANALYSIS MODEL:
	logistic conduct_bin harsh sex SEP hardship distress
	
	AUXILIARY VARIABLES:
	ccon_sum: 	SDQ conduct score at Wave 3
	ahd: 		Harsh discipline score at Wave 1
	chd: 		Harsh discipline score at Wave 3
	dhd: 		Harsh discipline score at Wave 4
	asep: 		Socioeconomic position at Wave 1
	csep: 		Socioeconomic position at Wave 3
	dsep: 		Socioeconomic position at Wave 4
	ahshipb: 	Hardship scale at Wave 1
	chshipb: 	Hardship scale at Wave 3
	dhshipb: 	Hardship scale at Wave 4
	ak6: 		Maternal distress (K6) at Wave 1 
	ck6: 		Maternal distress (K6) at Wave 3 
	dk6: 		Maternal distress (K6)at Wave 4 
	af03am: 	Maternal age
	af11am_: 	Main lang not English (1=Yes, 0=No)
	afd08m1_ : 	Mother completed high school (1=Yes, 0=No)
	zf12m1_ : 	Child has indigenous background (1=Yes, 0=No)
	asole:  	Sole versus two parents in home (1=Sole, 0=Not sole)
	sibling: 	Has sibling (1=Yes, 0=No)
	
______________________________________________________________________________*/


version 14.1
clear all
set more off

use "LSAC.dta"

/*______________________________________________________________________________
   ASSESSMENT OF MISSING DATA	

* Summary of missing data											*/
misstable summarize conduct_bin harsh sex SEP hardship distress

* Missing data patterns
misstable patterns conduct_bin harsh sex SEP hardship distress, asis freq

* Create missing data indicators
	// Missingness indicator variable for any analysis model variables
gen missing = missing(conduct_bin, harsh, sex, SEP, hardship, distress)

	// Missingness indicators for individual variables
foreach var of varlist conduct_bin harsh SEP hardship distress {
	gen missing_`var' = missing(`var')
}

/*______________________________________________________________________________
	PROPOSED IMPUTATION MODEL													*/
mi set flong

mi register imputed  conduct_cont ccon_sum ahd harsh chd dhd asep SEP csep dsep ///
ahshipb hardship chshipb dhshipb ak6 distress ck6 dk6 af03am af11am_ afd08m1_

mi register regular sex zf12m1_ asole sibling

mi register passive conduct_bin
  
mi impute chained ///
	(regress) conduct_cont ccon_sum ahd harsh chd dhd asep SEP csep dsep ahshipb hardship chshipb dhshipb ak6 distress ck6 dk6 af03am ///
	(logit) af11am_ afd08m1_ ///
	= sex zf12m1_ asole sibling, ///
	add(40) savetrace("trace", replace) rseed(27072016) 
	
save "LSAC_imputed.dta", replace // save the imputed dataset


/*______________________________________________________________________________
	SUMMARY STATISTICS 	- Observed and imputed								*/

* Observed
prop conduct_bin if missing_conduct_bin==0 & _mi_m==0
summ harsh if missing_harsh==0 & _mi_m==0
summ SEP if missing_SEP==0 & _mi_m==0
summ hardship if missing_hardship==0 & _mi_m==0
summ distress if missing_distress==0 & _mi_m==0*/ 	
	
 * Imputed 
mi estimate: prop conduct_bin if missing_conduct_bin==1
mi estimate: mean harsh if missing_harsh==1
mi estimate: mean SEP if missing_SEP==1
mi estimate: mean hardship if missing_hardship==1
mi estimate: mean distress if missing_distress==1

/*______________________________________________________________________________
  FIGURE 1: GRAPHS COMPARING THE DISTRIBUTIONS OF THE OBSERVED AND IMPUTED DATA					*/

* Figure 1a. Kernel density plot of the observed and imputed harsh discipline scores for one imputed dataset 
mi xeq 1: twoway(kdensity harsh if missing_harsh==0, lpattern(solid)) (kdensity harsh if missing_harsh==1, lpattern(dash)), ///
title("") xtitle("Harsh discipline") ytitle("Density") ylabel(,nogrid angle(horiz)) graphregion(color(white)) ///
legend(label(1 Observed) label(2 Imputed)) note("") 

* Figure 1b. Histogram of the observed and imputed harsh discipline scores for one imputed dataset 
mi xeq 1: twoway (hist harsh if missing_harsh==1, fcolor(gs9) lcolor(gs9) yscale(range(0 0.5))) ///
 (hist harsh if missing_harsh==0, fcolor(none) lcolor(black) yscale(range(0 0.5))), ///
 xtitle("Harsh discipline score") graphregion(color(white)) ylabel(, nogrid) legend(label(1 Imputed) label(2 Observed) order(2 1)) 
  
* Figure 1c Cumulative distribution plot of the observed (solid line) and the imputed (dashed line) harsh discipline scores 
distplot harsh if _mi_m==1, over(missing_harsh) graphregion(color(white)) ylabel(,nogrid) ///
xtitle("Harsh discipline score") legend(label(1 Observed) label(2 Imputed)) ytitle("Probability <= harsh") 
   
* Figure 1d. Plot of the quantiles of the imputed data against quantiles of the observed data (quantile-quantile plot) 
mi convert wide, clear
gen harsh_imp = _1_harsh if missing_harsh==1 // Generate a variable that only contains the imputed values 
qqplot harsh_imp harsh, graphregion(color(white)) xtitle("Harsh discipline - observed") ///
ytitle("Harsh discipline - imputed") ylabel(,nogrid) name(qqplot_harsh, replace) title("c", position(11))


/*______________________________________________________________________________
  FIGURE 2: BOXPLOTS OVER IMPUTATION NUMBER										*/

use "LSAC_imputed.dta", clear 
  
label define mislab 0 "observed" 1 "imputed"
label values missing_harsh mislab
gen harsh2=harsh if missing_harsh==1 // create a variable that only includes the imputed values
replace harsh2=harsh if _mi_m==0
replace harsh2=. if _mi_m>20

graph box harsh2, over(_mi_m) over(missing_harsh) graphregion(color(white)) ytitle("Harsh discipline score") ///
	 nofill intensity(0) medtype(cline) medline(lcolor(gs6))


/*______________________________________________________________________________
  FIGURE 3: PROPENSITIES OF RESPONSE										*/

use "LSAC_imputed.dta", clear

* Fit logistic model for response
logistic missing_harsh conduct_cont ccon_sum ahd chd dhd asep SEP csep dsep ///
ahshipb hardship chshipb dhshipb ak6 distress ck6 dk6 af03am af11am_ afd08m1_ sex zf12m1_ asole sibling
 
* Estimate propensity score
predict prop_score

* Fig 4- Plot of harsh vs propensity score
twoway (scatter harsh prop_score if _mi_m==2 & missing_harsh==0, msize(small) fcolor(none) msymbol(Oh) mcolor(black*.6) jitter(2)) ///
(scatter harsh prop_score if _mi_m==2 & missing_harsh==1, msize(tiny) mcolor(red*.6) msymbol(+)) ///
 (lowess harsh prop_score if _mi_m==2 & missing_harsh==0, lcolor(black) lpattern(solid)) ///
 (lowess harsh prop_score if _mi_m==2 & missing_harsh==1, lpattern(solid) lcolor(red)), ///
 legend(order(3 "Observed" 4 "Imputed")) graphregion(color(white)) ytitle("Harsh discipline score") xtitle("Probability of response")

// Numerical checks
* Create 5 strata
xtile prop_quintile = prop_score, nq(5)

* Tabulations/summaries
tabstat prop_score, by(prop_q) stat(mean min max n) 
table missing_harsh prop_quintile , c(mean harsh) row col f(%8.2f)
tabulate missing_harsh prop_quintile if _mi_m==1, summarize(harsh)

* ANOVA and margins for one variable
anova harsh missing_harsh prop_q missing_harsh#prop_q if _mi_m==1
margins missing_harsh#prop_q if _mi_m==1
marginsplot, noci
 
* ANOVA for all 40 imputed datasets - post results to a separate dataset (called "anova.dta")
capture postclose anova
capture postfile anova m df_m df_r F df_1 F_1 df_2 F_2 df_3 F_3 using anova.dta, replace
forval i=1(1)40 {
anova harsh missing_harsh##prop_q if _mi_m==`i'
post anova (`i') (e(df_m)) (e(df_r)) (e(F)) (e(df_1)) (e(F_1)) (e(df_2)) (e(F_2)) (e(df_3)) (e(F_3))
}
postclose anova
use anova.dta, clear
gen p = 1-F( df_m, df_r, F)
gen p_1 = 1-F( df_1, df_r, F_1)
gen p_2 = 1-F( df_2, df_r, F_2)
gen p_3 = 1-F( df_3, df_r, F_3)
summarize p*
count if p_1<.05
count if p_2<.05
count if p_3<.05 


/*______________________________________________________________________________
  FIGURE 4: RESIDUAL PLOTS	 */
* Import data (not imputed) 
use "LSAC.dta", clear 
 
* Fit regression imputation model (e.g. here we are checking the regression imputation model for harsh) 
regress harsh af03am i.afd08m1_ ahshipb asep ahd i.af11am_ SEP ///
hardship distress csep chshipb ak6 dsep conduct_cont dhshipb dhd dk6 ///
ccon_sum chd ck6 sex zf12m1_ asole sibling

* Plot the residuals against the fitted values
rvfplot

/*______________________________________________________________________________
  FIGURE 5: CROSS-VALIDATION												*/ 

use "LSAC.dta", clear
gen missing_harsh = missing(harsh)

*Generate variables (cvid and cvn) that labels the cases with missing data
sort missing_harsh hicid
by missing_harsh: gen cvid=_n if missing_harsh==0
by missing_harsh: gen cvn=_N if missing_harsh==0

* Register dataset for imputation
mi set flong
mi register imputed  conduct_cont ccon_sum ahd harsh chd dhd asep SEP csep dsep ///
ahshipb hardship chshipb dhshipb ak6 distress ck6 dk6 af03am af11am_ afd08m1_
mi register regular sex zf12m1_ asole sibling

* Cross-validation - leave one out in turn, "reimpute" and save to a dataset called cv.dta
set more off
local total = cvn 

capture postfile cv cvid m original imputed using "cv.dta", replace

forvalues i = 1(20)`total' {
	di `i'
	preserve
	qui summ harsh if cvid==`i'
	local original = r(mean)
	
	* Leave one out in turn
	qui replace harsh=. if cvid==`i'
	
	* Impute the missing values
	qui mi impute chained ///
	(regress) conduct_cont ccon_sum ahd harsh chd dhd asep SEP csep dsep ahshipb hardship chshipb dhshipb ak6 distress ck6 dk6 af03am ///
	(logit) af11am_ afd08m1_ ///
	= sex zf12m1_ asole sibling, add(20)
	
	forvalues m = 1(1)20 {
		quietly summ harsh if cvid==`i' & _mi_m==`m'
		local imputed = r(mean)
	
	post cv (`i') (`m') (`original') (`imputed') 
	
	}
	restore
}
	
postclose cv

preserve

use "cv.dta", clear

* Collapse cross-validation dataset to create summary statistics
collapse (mean) original=original (p50) median=imputed  (p5) lower=imputed (p95)  upper = imputed (count) n=imputed, by(cvid)

qui summ original
local min = r(min)
local max = r(max)

* Fig 5 - Scatterplot of imputed vs observed
twoway (rcap upper lower original, msize(vsmall) lcolor(gs12)) ///
(scatter median original, xtitle("observed harsh discipline scores") ///
ytitle("imputed harsh discipline scores") msize(small) msymbol(O) mcolor(black) )  ///
 (function y=x, range(0 `max')), legend(off) graphregion(color(white)) ///
 xscale(range(-1.2 `max')) xlabel(0 2 4 6 8) yscale(range(-1.2 `max')) ylabel(0 2 4 6 8)
 

/*_______________________________________________________________________________
	FIGURE 6: POSTERIOR PREDICTIVE CHECKING									*/ 
* Import data
use "LSAC.dta", clear

* Missing data indicators
foreach var of varlist conduct_bin harsh SEP hardship distress {
	gen missing_`var' = missing(`var')
}

*Duplicate dataset
expand 2, generate(rep)

*Set variables to missing in the duplicated portion
foreach var of varlist conduct_bin harsh SEP hardship distress {
	replace `var'=. if rep==1
}

* Register dataset for imputation
mi set flong
mi register imputed  conduct_bin ccon_sum ahd harsh chd dhd asep SEP csep dsep ///
ahshipb hardship chshipb dhshipb ak6 distress ck6 dk6 af03am af11am_ afd08m1_

mi register regular sex zf12m1_ asole sibling

save "LSAC_duplicated_mi_set2.dta", replace

*Run PPC 20 times (x 100 l1). This creates 2000 posterior predictive replications (but this task has been split into sets of 100 replicates).

forvalues i=1(1)20 {

	use "LSAC_duplicated_mi_set2.dta", clear
	
	mi impute chained ///
	(regress) ccon_sum ahd harsh chd dhd asep SEP csep dsep ///
	ahshipb hardship chshipb dhshipb ak6 distress ck6 dk6 af03am ///
	(logit) conduct_bin af11am_ afd08m1_ ///
	= sex zf12m1_ asole sibling, ///
	add(100) 
	
	gen l1=_mi_m if _mi_m>0
	statsby, by(l1 rep) clear: logistic conduct_bin harsh sex SEP hardship distress
	
	save "pbcom_`i'.dta", replace
}

*Merge datasets
forvalues i=1(1)20 {
		use "pbcom_`i'.dta", clear
		gen n=l1
		replace l1=(`i'-1)*100+l1
		save, replace
	}


	use "pbcom_1.dta", clear
	append using "pbcom_2.dta"	"pbcom_3.dta" "pbcom_4.dta" "pbcom_5.dta" "pbcom_6.dta" ///
	"pbcom_7.dta" "pbcom_8.dta" "pbcom_9.dta" "pbcom_10.dta" "pbcom_11.dta" "pbcom_12.dta" ///
	"pbcom_13.dta" "pbcom_14.dta" "pbcom_15.dta" "pbcom_16.dta" ///
	"pbcom_17.dta" 	"pbcom_18.dta" 	"pbcom_19.dta" 	"pbcom_20.dta" 	


* Table of posterior predictive means
Table1 conduct_bin_b_harsh(cts) conduct_bin_b_sex(cts) conduct_bin_b_SEP(cts) ///
conduct_bin_b_hardship(cts) conduct_bin_b_distress(cts) conduct_bin_b_cons(cts),mean(%9.2f) by(rep) 
	
*Reshape data
reshape wide conduct_bin_b_harsh conduct_bin_b_sex conduct_bin_b_SEP ///
conduct_bin_b_hardship conduct_bin_b_distress conduct_bin_b_cons , i(l1) j(rep)

*Calculate posterior predictive p-values for each test quantity
foreach t in  _b_harsh _b_sex _b_SEP  _b_hardship _b_distress  {	
	qui gen discrepancy_`t'=conduct_bin`t'1-conduct_bin`t'0
	qui gen i_discrepancy_`t' = conduct_bin`t'1>=conduct_bin`t'0
	qui summarize i_discrepancy_`t'
	di "pbcom_`t'=" r(mean)
}

* Fig 6. Scatterplot
twoway (scatter conduct_bin_b_bhd1 conduct_bin_b_bhd0) (function y=x, range(.15 .4)), ///
ytitle("Replicated") xtitle("Completed") xscale(range(.15 .4)) xlabel(.15 (0.05) .4) ///
yscale(range(.15 .4)) ylabel(.15 (0.05) .4) legend(off) graphregion(color(white))
